# Supplementary material for: Determining Tropical Cyclone Center and Rainband Size in Geostationary Satellite Imagery
Source: MDPI journal article supplement (doi:10.3390/rs14143499), 2022-07-21
Supplement: s1 [file s1]

**Table S1.** The best track center, ABI-determined center,  $R_{IR}$  and  $R_{OR}$  of Hurricane Irma from 1800 UTC 30 August to 1800 UTC 10 September 2017.

| Date/Time<br>(UTC) | Best Track Center<br>(°W, °N) | ABI-Determined<br>Center (°W, °N) | $R_{IR}$<br>(km) | $R_{OR}$<br>(km) |
|--------------------|-------------------------------|-----------------------------------|------------------|------------------|
| 30/1800            | (30.8, 16.3)                  | (30.73, 16.13)                    | 338.05           | 876.99           |
| 31/0000            | (31.7, 16.3)                  | (31.75, 16.25)                    | 223.93           | 847.92           |
| 31/0600            | (32.5, 16.4)                  | (32.50, 16.20)                    | 242.08           | 857.85           |
| 31/1200            | (33.4, 16.7)                  | (33.55, 16.60)                    | 276.69           | 889.37           |
| 31/1800            | (34.2, 17.1)                  | (34.00, 17.10)                    | 494.27           | 922.92           |
| 01/0000            | (35.1, 17.5)                  | (34.90, 17.55)                    | 314.74           | 880.04           |
| 01/0600            | (36.1, 17.9)                  | (35.90, 17.85)                    | 272.15           | 849.71           |
| 01/1200            | (37.3, 18.4)                  | (37.15, 18.45)                    | 272.08           | 894.29           |
| 01/1800            | (38.5, 18.8)                  | (38.40, 18.80)                    | 329.58           | 818.09           |
| 02/0000            | (39.7, 19.1)                  | (39.65, 19.05)                    | 416.13           | 892.22           |
| 02/0600            | (41.1, 19.1)                  | (41.10, 19.20)                    | 212.16           | 830.99           |
| 02/1200            | (42.6, 18.9)                  | (42.40, 19.00)                    | 258.59           | 848.43           |
| 02/1800            | (44.1, 18.7)                  | (44.03, 18.70)                    | 263.34           | 871.66           |
| 03/0000            | (45.5, 18.5)                  | (45.30, 18.65)                    | 261.67           | 883.33           |
| 03/0600            | (46.7, 18.2)                  | (46.65, 18.30)                    | 438.02           | 859.48           |
| 03/1200            | (47.9, 17.9)                  | (47.90, 17.85)                    | 263.67           | 889.78           |
| 03/1800            | (49.2, 17.6)                  | (49.30, 17.80)                    | 387.38           | 834.58           |

|           |                   |                |                 |                 |
|-----------|-------------------|----------------|-----------------|-----------------|
| 04/0000   | (50.4, 17.3)      | (50.45, 17.25) | 285.00          | 925.39          |
| 04/0600   | (51.5, 17.0)      | (51.52, 17.00) | 282.15          | 899.99          |
| 04/1200   | (52.6, 16.8)      | (52.58, 16.93) | 360.60          | 823.38          |
| 04/1800   | (53.9, 16.7)      | (53.90, 16.75) | 235.03          | 838.10          |
| 05/0000   | (55.1, 16.6)      | (55.10, 16.75) | 327.92          | 914.97          |
| 05/0600   | (56.4, 16.6)      | (56.40, 16.70) | 355.19          | 901.77          |
| 05/1200   | (57.8, 16.7)      | (57.70, 16.75) | 370.60          | 881.81          |
| 05/1800   | (59.2, 16.9)      | (59.10, 17.00) | 442.31          | 867.49          |
| 06/0000   | (60.6, 17.3)      | (60.40, 17.30) | 375.42          | 848.17          |
| 06/0600   | (61.9, 17.7)      | (61.80, 17.80) | 459.36          | 839.00          |
| 06/1200   | (63.3, 18.1)      | (63.25, 18.15) | 454.58          | 837.82          |
| 06/1800   | (64.7, 18.6)      | (64.65, 18.60) | 457.08          | 873.74          |
| 07/0000   | (66.2, 19.2)      | (66.00, 19.20) | 512.08          | 870.42          |
| 07/0600   | (67.6, 19.7)      | (67.55, 19.75) | 411.08          | 891.42          |
| 07/1200   | (69.0, 20.2)      | (68.85, 20.15) | 481.68          | 979.70          |
| 07/1800   | (70.4, 20.7)      | (70.40, 20.90) | 451.90          | 874.82          |
| 08/0000   | (71.8, 21.1)      | (71.80, 21.20) | 385.15          | 865.50          |
| 08/0600   | (73.2, 21.5)      | (73.2, 21.60)  | 371.70          | 956.47          |
| 08/1200   | (74.7, 21.8)      | (74.50, 21.85) | 593.51          | 865.91          |
| 08/1800   | (76.0, 22.0)      | (75.90, 22.00) | 481.52          | 923.87          |
| 09/0000   | (77.2, 22.1)      | (77.30, 22.20) | 308.24          | 926.30          |
| Date/Time | Best Track Center | ABI-Determined | R <sub>IR</sub> | R <sub>OR</sub> |

| (UTC)   | (°W, °N)     | Center (°W, °N) | (km)   | (km)   |
|---------|--------------|-----------------|--------|--------|
| 09/0600 | (78.3, 22.4) | (78.20, 22.40)  | 549.04 | 900.01 |
| 09/1200 | (79.3, 22.7) | (79.10, 22.80)  | 175.42 | 860.66 |
| 09/1800 | (80.2, 23.1) | (80.00, 23.15)  | 242.14 | 841.00 |
| 10/0000 | (80.9, 23.4) | (80.70, 23.33)  | 302.47 | 887.69 |
| 10/0600 | (81.3, 23.7) | (81.15, 23.75)  | 219.52 | 872.32 |
| 10/1200 | (81.5, 24.5) | (81.45, 24.55)  | 247.92 | 876.67 |
| 10/1800 | (81.7, 25.6) | (81.50, 25.68)  | 265.53 | 882.92 |

**Table S2.** Same as Table S1 except for Hurricane Jose from 0600 UTC 6 September to 1800 UTC 21 September 2017.

| Date/Time<br>(UTC) | Best Track Center<br>(°W, °N) | ABI-Determined<br>Center (°W, °N) | R <sub>IR</sub><br>(km) | R <sub>OR</sub><br>(km) |
|--------------------|-------------------------------|-----------------------------------|-------------------------|-------------------------|
| 06/0600            | (42.6, 12.5)                  | (42.40, 12.30)                    | 306.67                  | 845.50                  |
| 06/1200            | (43.9, 13.1)                  | (43.70, 12.90)                    | 318.91                  | 859.40                  |
| 06/1800            | (45.2, 13.7)                  | (44.95, 13.55)                    | 320.91                  | 839.16                  |
| 07/0000            | (46.7, 14.1)                  | (46.20, 14.60)                    | 389.12                  | 876.72                  |
| 07/0600            | (48.3, 14.4)                  | (48.00, 14.70)                    | 303.59                  | 878.11                  |
| 07/1200            | (49.9, 14.7)                  | (49.70, 14.70)                    | 251.09                  | 844.93                  |
| 07/1800            | (51.5, 15.1)                  | (51.30, 15.15)                    | 252.46                  | 847.54                  |
| 08/0000            | (53.2, 15.5)                  | (53.18, 15.50)                    | 173.37                  | 896.46                  |
| 08/0600            | (54.9, 15.9)                  | (54.60, 16.05)                    | 194.93                  | 832.08                  |
| 08/1200            | (56.4, 16.1)                  | (56.25, 16.20)                    | 238.66                  | 853.89                  |
| 08/1800            | (57.8, 16.4)                  | (57.65, 16.43)                    | 256.56                  | 859.08                  |
| 09/0000            | (58.9, 16.7)                  | (58.80, 16.75)                    | 183.10                  | 856.90                  |
| 09/0600            | (59.9, 17.2)                  | (59.70, 17.20)                    | 156.50                  | 874.31                  |
| 09/1200            | (60.8, 17.9)                  | (60.60, 18.10)                    | 212.01                  | 872.86                  |
| 09/1800            | (61.8, 18.6)                  | (61.83, 18.80)                    | 159.47                  | 907.92                  |
| 10/0000            | (62.9, 19.4)                  | (62.80, 19.55)                    | 182.19                  | 820.46                  |
| 10/0600            | (64.0, 20.3)                  | (64.00, 20.45)                    | 262.76                  | 923.90                  |

|           |                   |                |                 |                 |
|-----------|-------------------|----------------|-----------------|-----------------|
| 10/1200   | (65.3, 21.2)      | (65.30, 21.25) | 227.91          | 843.18          |
| 10/1800   | (66.5, 22.2)      | (66.30, 22.10) | 276.24          | 878.85          |
| 11/0000   | (67.6, 23.3)      | (67.65, 23.00) | 245.34          | 872.01          |
| 11/0600   | (68.6, 24.3)      | (68.40, 24.10) | 148.57          | 834.06          |
| 11/1200   | (69.4, 25.4)      | (69.20, 25.20) | 120.84          | 874.02          |
| 11/1800   | (69.5, 26.5)      | (69.35, 26.30) | 294.39          | 857.08          |
| 12/0000   | (69.4, 27.2)      | (69.70, 26.90) | 197.15          | 841.87          |
| 12/0600   | (69.1, 27.6)      | (69.33, 27.30) | 225.49          | 897.08          |
| 12/1200   | (68.3, 27.7)      | (68.10, 27.50) | 163.79          | 892.84          |
| 12/1800   | (67.4, 27.4)      | (67.15, 27.15) | 318.62          | 903.63          |
| 13/0000   | (66.7, 26.8)      | (66.40, 26.50) | 255.34          | 900.22          |
| 13/0600   | (66.2, 26.3)      | (65.90, 26.00) | 454.47          | 886.74          |
| 13/1200   | (65.8, 25.8)      | (65.50, 25.50) | 330.99          | 845.36          |
| 13/1800   | (65.6, 25.4)      | (65.38, 25.10) | 363.63          | 853.93          |
| 14/0000   | (65.7, 25.1)      | (65.40, 24.80) | 419.94          | 860.05          |
| 14/0600   | (65.9, 24.9)      | (65.50, 24.95) | 280.54          | 865.91          |
| 14/1200   | (66.3, 24.8)      | (66.00, 24.50) | 407.08          | 921.87          |
| 14/1800   | (66.9, 25.0)      | (66.55, 24.80) | 317.08          | 853.85          |
| 15/0000   | (67.6, 25.4)      | (67.20, 25.50) | 209.58          | 835.42          |
| 15/0600   | (68.2, 25.8)      | (67.95, 26.00) | 292.28          | 859.96          |
| 15/1200   | (69.0, 26.3)      | (68.68, 26.30) | 407.88          | 857.44          |
| Date/Time | Best Track Center | ABI-Determined | R <sub>IR</sub> | R <sub>OR</sub> |

| (UTC)   | (°W, °N)     | Center (°W, °N) | (km)   | (km)   |
|---------|--------------|-----------------|--------|--------|
| 15/1800 | (69.9, 26.8) | (69.60, 27.05)  | 392.64 | 839.86 |
| 16/0000 | (70.7, 27.2) | (70.40, 27.45)  | 253.66 | 835.13 |
| 16/0600 | (71.4, 27.7) | (71.10, 27.75)  | 181.05 | 843.57 |
| 16/1200 | (71.8, 28.2) | (71.60, 28.50)  | 160.32 | 888.56 |
| 16/1800 | (72.0, 28.6) | (71.70, 28.90)  | 217.57 | 909.60 |
| 17/0000 | (72.0, 29.1) | (71.80, 29.30)  | 311.33 | 928.55 |
| 17/0600 | (72.0, 29.8) | (71.70, 30.10)  | 332.90 | 825.07 |
| 17/1200 | (71.9, 30.5) | (71.78, 30.90)  | 317.62 | 872.60 |
| 17/1800 | (71.8, 31.2) | (71.60, 31.40)  | 397.98 | 885.00 |
| 18/0000 | (71.6, 31.9) | (71.90, 32.10)  | 247.08 | 862.31 |
| 18/0600 | (71.4, 32.7) | (71.00, 32.35)  | 134.58 | 914.61 |
| 18/1200 | (71.2, 33.5) | (71.35, 33.20)  | 114.46 | 898.13 |
| 18/1800 | (71.2, 34.2) | (71.50, 33.80)  | 120.66 | 919.91 |
| 19/0000 | (71.4, 34.9) | (71.70, 35.20)  | 127.84 | 839.58 |
| 19/0600 | (71.6, 35.6) | (71.28, 35.40)  | 116.85 | 825.87 |
| 19/1200 | (71.7, 36.3) | (71.20, 36.00)  | 181.21 | 850.15 |
| 19/1800 | (71.5, 37.0) | (71.90, 37.25)  | 186.03 | 835.42 |
| 20/0000 | (71.2, 37.6) | (71.60, 37.25)  | 212.24 | 962.92 |
| 20/0600 | (70.8, 38.1) | (70.95, 38.60)  | 222.51 | 896.81 |
| 20/1200 | (70.2, 38.7) | (69.95, 38.45)  | 203.25 | 889.25 |
| 20/1800 | (69.4, 39.2) | (69.60, 38.75)  | 131.91 | 958.86 |

|         |              |                |        |        |
|---------|--------------|----------------|--------|--------|
| 21/0000 | (68.5, 39.4) | (68.45, 38.90) | 127.18 | 899.32 |
| 21/0600 | (68.1, 39.7) | (68.33, 39.20) | 187.04 | 865.55 |
| 21/1200 | (68.0, 39.7) | (67.70, 39.30) | 210.99 | 917.15 |
| 21/1800 | (68.0, 39.5) | (67.55, 39.95) | 119.50 | 886.31 |
